# Supplementary material
Source: PubMed Central journal article supplement (PMC3991240)
Supplement: NIHMS500442-supplement-04.pdf [file NIHMS500442-supplement-04.pdf]

**Table E3: Cellular and Molecular Correlations (Pearson coefficient) with Disease Activity (SCORAD) in Lesional AD skin**

| Variable (mRNA in black;<br>Cell counts in blue) | R (Extrinsic) | p-value<br>(Extrinsic) | n  | R (Intrinsic) | p-value<br>(Intrinsic) | n |
|--------------------------------------------------|---------------|------------------------|----|---------------|------------------------|---|
| <b>SCORAD</b>                                    | 1.00          | 0.00                   | 33 | 1.00          | 0.00                   | 9 |
| <b>log(IgE)</b>                                  | 0.76          | 0.00                   | 33 | 0.11          | 0.77                   | 9 |
| <b>TRAIL</b>                                     | 0.68          | 0.07                   | 8  | 0.75          | 0.05                   | 7 |
| <b>IL-21</b>                                     | 0.67          | 0.07                   | 8  | -0.19         | 0.68                   | 7 |
| <b>IL-4</b>                                      | 0.67          | 0.07                   | 8  | 0.65          | 0.12                   | 7 |
| <b>S100A12</b>                                   | 0.63          | 0.09                   | 8  | 0.75          | 0.05                   | 7 |
| <b>IL-19</b>                                     | 0.62          | 0.10                   | 8  | 0.21          | 0.65                   | 7 |
| <b>CXCL9</b>                                     | 0.58          | 0.13                   | 8  | -0.16         | 0.73                   | 7 |
| <b>IFNa</b>                                      | 0.57          | 0.14                   | 8  | 0.81          | 0.03                   | 7 |
| <b>CXCL11</b>                                    | 0.56          | 0.15                   | 8  | -0.08         | 0.86                   | 7 |
| <b>IgE</b>                                       | 0.52          | 0.00                   | 33 | 0.22          | 0.57                   | 9 |
| <b>OX40L</b>                                     | 0.44          | 0.28                   | 8  | -0.32         | 0.48                   | 7 |
| <b>IL-9</b>                                      | 0.43          | 0.29                   | 8  | -0.37         | 0.42                   | 7 |
| <b>MMP12</b>                                     | 0.39          | 0.06                   | 24 | 0.66          | 0.07                   | 8 |
| <b>TGM3</b>                                      | 0.39          | 0.15                   | 15 | 0.47          | 0.28                   | 7 |
| <b>S100A9</b>                                    | 0.38          | 0.35                   | 8  | -0.05         | 0.91                   | 7 |
| <b>IL-5</b>                                      | 0.37          | 0.07                   | 25 | 0.02          | 0.96                   | 9 |
| <b>MX1</b>                                       | 0.36          | 0.17                   | 16 | -0.11         | 0.77                   | 9 |
| <b>CCL20</b>                                     | 0.36          | 0.38                   | 8  | 0.68          | 0.10                   | 7 |
| <b>IL-20</b>                                     | 0.35          | 0.40                   | 8  | 0.26          | 0.57                   | 7 |
| <b>Elafin</b>                                    | 0.32          | 0.13                   | 23 | 0.42          | 0.30                   | 8 |
| <b>IL-17A</b>                                    | 0.32          | 0.14                   | 23 | -0.27         | 0.48                   | 9 |
| <b>TRAIL</b>                                     | 0.31          | 0.32                   | 12 | 0.64          | 0.24                   | 5 |
| <b>S100A8</b>                                    | 0.31          | 0.27                   | 15 | -0.03         | 0.94                   | 9 |
| <b>CD8</b>                                       | 0.30          | 0.34                   | 12 | 0.71          | 0.18                   | 5 |
| <b>CD206</b>                                     | 0.30          | 0.21                   | 19 | -0.69         | 0.20                   | 5 |
| <b>IL-22</b>                                     | 0.30          | 0.26                   | 16 | -0.32         | 0.40                   | 9 |
| <b>TGM1</b>                                      | 0.30          | 0.18                   | 22 | 0.04          | 0.92                   | 9 |
| <b>IL-32</b>                                     | 0.27          | 0.51                   | 8  | 0.20          | 0.67                   | 7 |
| <b>CCL2</b>                                      | 0.26          | 0.39                   | 13 | 0.17          | 0.68                   | 8 |
| <b>CXCL10</b>                                    | 0.25          | 0.48                   | 10 | -0.08         | 0.85                   | 8 |
| <b>IL-8</b>                                      | 0.25          | 0.27                   | 22 | -0.25         | 0.55                   | 8 |
| <b>OX40L</b>                                     | 0.24          | 0.46                   | 12 | 0.01          | 0.98                   | 5 |
| <b>IL-31</b>                                     | 0.23          | 0.39                   | 16 | -0.36         | 0.34                   | 9 |
| <b>CCL22</b>                                     | 0.22          | 0.44                   | 15 | -0.06         | 0.88                   | 9 |
| <b>IVL</b>                                       | 0.20          | 0.67                   | 7  | -             | -                      | - |

| Variable (mRNA in black;<br>Cell counts in blue) | R (Extrinsic) | p-value<br>(Extrinsic) | n         | R (Intrinsic) | p-value<br>(Intrinsic) | n        |
|--------------------------------------------------|---------------|------------------------|-----------|---------------|------------------------|----------|
| <b>BDCA-2</b>                                    | <b>0.19</b>   | <b>0.71</b>            | <b>6</b>  | <b>0.74</b>   | <b>0.26</b>            | <b>4</b> |
| <b>K16</b>                                       | 0.17          | 0.42                   | 25        | -0.17         | 0.66                   | 9        |
| <b>Epidermal Thickness</b>                       | 0.10          | 0.65                   | 24        | -0.41         | 0.49                   | 5        |
| <b>S100A7</b>                                    | 0.09          | 0.76                   | 13        | 0.01          | 0.98                   | 9        |
| <b>IL-10</b>                                     | 0.09          | 0.68                   | 25        | 0.43          | 0.24                   | 9        |
| <b>CD1a</b>                                      | <b>0.08</b>   | <b>0.72</b>            | <b>21</b> | <b>0.98</b>   | <b>0.00</b>            | <b>5</b> |
| <b>CD11c</b>                                     | <b>0.08</b>   | <b>0.71</b>            | <b>24</b> | <b>-0.41</b>  | <b>0.49</b>            | <b>5</b> |
| <b>Thickness-ST</b>                              | 0.08          | 0.71                   | 24        | -0.24         | 0.70                   | 5        |
| <b>CD3</b>                                       | <b>0.07</b>   | <b>0.75</b>            | <b>24</b> | <b>0.13</b>   | <b>0.83</b>            | <b>5</b> |
| <b>CCL17</b>                                     | 0.07          | 0.80                   | 16        | -0.03         | 0.93                   | 9        |
| <b>CCL11</b>                                     | 0.06          | 0.81                   | 16        | -0.31         | 0.42                   | 9        |
| <b>CCL13</b>                                     | 0.06          | 0.84                   | 15        | 0.01          | 0.99                   | 8        |
| <b>FcER1</b>                                     | <b>0.04</b>   | <b>0.84</b>            | <b>24</b> | <b>0.49</b>   | <b>0.40</b>            | <b>5</b> |
| <b>CDSN</b>                                      | 0.04          | 0.85                   | 23        | 0.27          | 0.48                   | 9        |
| <b>IL-1B</b>                                     | 0.03          | 0.90                   | 17        | 0.69          | 0.08                   | 7        |
| <b>CD83</b>                                      | <b>-0.02</b>  | <b>0.93</b>            | <b>18</b> | <b>-0.30</b>  | <b>0.62</b>            | <b>5</b> |
| <b>Ki67</b>                                      | <b>-0.03</b>  | <b>0.90</b>            | <b>24</b> | <b>-0.27</b>  | <b>0.67</b>            | <b>5</b> |
| <b>CCL18</b>                                     | -0.03         | 0.88                   | 24        | -0.29         | 0.45                   | 9        |
| <b>IFN-g</b>                                     | -0.04         | 0.88                   | 22        | -0.21         | 0.59                   | 9        |
| <b>TSLPR</b>                                     | -0.06         | 0.78                   | 22        | 0.29          | 0.49                   | 8        |
| <b>FOXP3</b>                                     | -0.08         | 0.84                   | 9         | -0.37         | 0.47                   | 6        |
| <b>IL-12p35</b>                                  | -0.10         | 0.63                   | 24        | -0.04         | 0.95                   | 5        |
| <b>IL-33</b>                                     | -0.11         | 0.80                   | 8         | 0.14          | 0.77                   | 7        |
| <b>LCN2</b>                                      | -0.11         | 0.70                   | 15        | 0.34          | 0.42                   | 8        |
| <b>IL-23p19</b>                                  | -0.11         | 0.60                   | 25        | 0.00          | 1.00                   | 9        |
| <b>CCL26</b>                                     | -0.12         | 0.77                   | 8         | -0.23         | 0.62                   | 7        |
| <b>CD1b</b>                                      | <b>-0.13</b>  | <b>0.65</b>            | <b>15</b> | -             | -                      | -        |
| <b>CX3CL1</b>                                    | -0.13         | 0.64                   | 15        | 0.72          | 0.04                   | 8        |
| <b>IL-13</b>                                     | -0.14         | 0.54                   | 23        | 0.41          | 0.27                   | 9        |
| <b>Tryptase</b>                                  | -0.19         | 0.57                   | 11        | -0.68         | 0.21                   | 5        |
| <b>CD1c</b>                                      | -0.19         | 0.49                   | 15        | -0.61         | 0.27                   | 5        |
| <b>CCL5</b>                                      | -0.21         | 0.40                   | 18        | 0.12          | 0.78                   | 8        |
| <b>MBP</b>                                       | -0.22         | 0.52                   | 11        | -0.27         | 0.49                   | 9        |
| <b>IL-23p40</b>                                  | -0.23         | 0.62                   | 7         | -             | -                      | -        |
| <b>IL-25</b>                                     | <b>-0.27</b>  | <b>0.52</b>            | <b>8</b>  | -             | -                      | -        |
| <b>IL-23p40</b>                                  | -0.28         | 0.17                   | 25        | -0.27         | 0.49                   | 9        |
| <b>Filaggrin</b>                                 | -0.31         | 0.45                   | 8         | 0.72          | 0.07                   | 7        |

| Variable (mRNA in black;<br>Cell counts in blue) | R (Extrinsic) | p-value<br>(Extrinsic) | n  | R (Intrinsic) | p-value<br>(Intrinsic) | n |
|--------------------------------------------------|---------------|------------------------|----|---------------|------------------------|---|
| <b>PPL</b>                                       | -0.44         | 0.09                   | 16 | -0.58         | 0.10                   | 9 |
| <b>DC-LAMP</b>                                   | -0.56         | 0.12                   | 9  | -0.62         | 0.57                   | 3 |
| <b>Loricrin</b>                                  | -0.59         | 0.02                   | 16 | -0.04         | 0.91                   | 9 |
| <b>Neutrophil Elastase</b>                       | -0.64         | 0.25                   | 5  | -0.12         | 0.82                   | 6 |
