# Supplementary material
Source: PubMed Central journal article supplement (PMC3991240)
Supplement: NIHMS500442-supplement-05.pdf [file NIHMS500442-supplement-05.pdf]

**Table E4: Cellular and Molecular Correlations (Pearson Coefficient) with Disease Activity (SCORAD) in Non-Lesional AD skin**

| Variable (mRNA in black; Cell counts in blue) | R (Extrinsic) | p-value (Extrinsic) | n  | R (Intrinsic) | p-value (Intrinsic) | n |
|-----------------------------------------------|---------------|---------------------|----|---------------|---------------------|---|
| <b>SCORAD</b>                                 | 1.00          | 0.00                | 24 | 1.00          | 0.00                | 9 |
| <b>BDCA-2</b>                                 | 0.85          | 0.01                | 7  | 0.98          | 0.02                | 4 |
| <b>CXCL11</b>                                 | 0.48          | 0.23                | 8  | -0.09         | 0.85                | 7 |
| <b>CCL20</b>                                  | 0.47          | 0.24                | 8  | 0.19          | 0.69                | 7 |
| <b>IL-20</b>                                  | 0.47          | 0.24                | 8  | 0.54          | 0.22                | 7 |
| <b>CD3</b>                                    | 0.46          | 0.07                | 16 | 0.32          | 0.60                | 5 |
| <b>TGM3</b>                                   | 0.45          | 0.26                | 8  | 0.27          | 0.56                | 7 |
| <b>TRAIL</b>                                  | 0.39          | 0.34                | 8  | 0.36          | 0.43                | 7 |
| <b>CD1a</b>                                   | 0.39          | 0.17                | 14 | 0.54          | 0.35                | 5 |
| <b>IL-19</b>                                  | 0.38          | 0.35                | 8  | 0.30          | 0.51                | 7 |
| <b>FcER1</b>                                  | 0.31          | 0.25                | 16 | 0.43          | 0.47                | 5 |
| <b>MMP12</b>                                  | 0.30          | 0.35                | 12 | 0.61          | 0.08                | 9 |
| <b>IL-4</b>                                   | 0.27          | 0.52                | 8  | -0.69         | 0.08                | 7 |
| <b>IFN<math>\alpha</math></b>                 | 0.22          | 0.60                | 8  | 0.74          | 0.06                | 7 |
| <b>OX40L</b>                                  | 0.20          | 0.63                | 8  | 0.53          | 0.22                | 7 |
| <b>Tryptase</b>                               | 0.17          | 0.62                | 11 | 0.23          | 0.71                | 5 |
| <b>CD8</b>                                    | 0.15          | 0.64                | 12 | -0.08         | 0.90                | 5 |
| <b>CXCL9</b>                                  | 0.08          | 0.84                | 8  | -0.23         | 0.62                | 7 |
| <b>Filaggrin</b>                              | 0.06          | 0.89                | 8  | 0.40          | 0.37                | 7 |
| <b>Loricrin</b>                               | 0.06          | 0.84                | 16 | -0.07         | 0.86                | 9 |
| <b>CCL17</b>                                  | 0.05          | 0.86                | 16 | 0.03          | 0.95                | 9 |
| <b>IL-33</b>                                  | 0.02          | 0.96                | 8  | 0.07          | 0.89                | 7 |
| <b>IL-1B</b>                                  | 0.00          | 0.99                | 8  | 0.61          | 0.15                | 7 |
| <b>IL-8</b>                                   | -0.01         | 0.99                | 12 | 0.53          | 0.14                | 9 |
| <b>IL-23p19</b>                               | -0.01         | 0.98                | 16 | -0.16         | 0.69                | 9 |
| <b>Neutrophil Elastase</b>                    | -0.01         | 0.99                | 5  | 0.21          | 0.69                | 6 |
| <b>CCL22</b>                                  | -0.02         | 0.94                | 16 | 0.18          | 0.65                | 9 |
| <b>K16</b>                                    | -0.04         | 0.87                | 16 | 0.22          | 0.57                | 9 |
| <b>IL-21</b>                                  | -0.06         | 0.89                | 8  | -0.13         | 0.78                | 7 |
| <b>CX3CL1</b>                                 | -0.06         | 0.82                | 15 | -0.22         | 0.56                | 9 |
| <b>CXCL10</b>                                 | -0.07         | 0.84                | 12 | 0.20          | 0.60                | 9 |
| <b>IL-13</b>                                  | -0.07         | 0.80                | 16 | 0.03          | 0.94                | 9 |
| <b>MX1</b>                                    | -0.08         | 0.78                | 16 | 0.16          | 0.68                | 9 |

| Variable (mRNA in black; Cell counts in blue) | R (Extrinsic) | p-value (Extrinsic) | n  | R (Intrinsic) | p-value (Intrinsic) | n |
|-----------------------------------------------|---------------|---------------------|----|---------------|---------------------|---|
| <b>Ki67</b>                                   | -0.08         | 0.77                | 16 | -0.66         | 0.22                | 5 |
| <b>IFN-g</b>                                  | -0.10         | 0.72                | 16 | 0.13          | 0.73                | 9 |
| <b>LCN2</b>                                   | -0.12         | 0.71                | 13 | 0.09          | 0.82                | 9 |
| <b>PPL</b>                                    | -0.12         | 0.67                | 16 | -0.07         | 0.85                | 9 |
| <b>IL-32</b>                                  | -0.12         | 0.78                | 8  | 0.34          | 0.45                | 7 |
| <b>CCL26</b>                                  | -0.12         | 0.77                | 8  | 0.16          | 0.73                | 7 |
| <b>CCL2</b>                                   | -0.14         | 0.62                | 15 | 0.08          | 0.84                | 9 |
| <b>CDSN</b>                                   | -0.15         | 0.58                | 16 | -0.02         | 0.96                | 9 |
| <b>log-IgE</b>                                | -0.15         | 0.48                | 24 | 0.20          | 0.60                | 9 |
| <b>CD206</b>                                  | -0.15         | 0.65                | 11 | 0.36          | 0.55                | 5 |
| <b>CCL13</b>                                  | -0.16         | 0.63                | 12 | -0.33         | 0.39                | 9 |
| <b>S100A9</b>                                 | -0.16         | 0.71                | 8  | 0.46          | 0.30                | 7 |
| <b>CCL18</b>                                  | -0.17         | 0.54                | 16 | 0.08          | 0.83                | 9 |
| <b>IL-23p40</b>                               | -0.18         | 0.50                | 16 | -0.36         | 0.34                | 9 |
| <b>CCL11</b>                                  | -0.20         | 0.46                | 16 | -0.32         | 0.40                | 9 |
| <b>IgE</b>                                    | -0.22         | 0.31                | 24 | 0.29          | 0.45                | 9 |
| <b>TSLPR</b>                                  | -0.26         | 0.35                | 15 | 0.33          | 0.38                | 9 |
| <b>CD1c</b>                                   | -0.27         | 0.32                | 16 | -0.13         | 0.84                | 5 |
| <b>TGM1</b>                                   | -0.28         | 0.32                | 15 | 0.14          | 0.71                | 9 |
| <b>IL-10</b>                                  | -0.28         | 0.30                | 16 | 0.08          | 0.83                | 9 |
| <b>S100A12</b>                                | -0.28         | 0.50                | 8  | 0.26          | 0.57                | 7 |
| <b>IL-5</b>                                   | -0.29         | 0.27                | 16 | 0.01          | 0.98                | 9 |
| <b>CCL5</b>                                   | -0.32         | 0.29                | 13 | -0.13         | 0.75                | 9 |
| <b>IL-12p35</b>                               | -0.35         | 0.20                | 15 | -0.23         | 0.70                | 5 |
| <b>IL-9</b>                                   | -0.35         | 0.40                | 8  | 0.18          | 0.70                | 7 |
| <b>IL-22</b>                                  | -0.37         | 0.16                | 16 | -0.03         | 0.93                | 9 |
| <b>Elafin</b>                                 | -0.41         | 0.17                | 13 | 0.13          | 0.75                | 8 |
| <b>IL-17A</b>                                 | -0.42         | 0.11                | 16 | 0.00          | 1.00                | 9 |
| <b>S100A7</b>                                 | -0.43         | 0.11                | 15 | 0.34          | 0.37                | 9 |
| <b>S100A8</b>                                 | -0.45         | 0.09                | 15 | 0.25          | 0.52                | 9 |
| <b>IL-31</b>                                  | -0.53         | 0.03                | 16 | 0.09          | 0.82                | 9 |
| <b>MBP</b>                                    | -0.57         | 0.07                | 11 | -0.18         | 0.64                | 9 |
| <b>FOXP3</b>                                  | -0.61         | 0.08                | 9  | 0.17          | 0.74                | 6 |
| <b>DC-LAMP</b>                                | -0.65         | 0.24                | 5  | 0.98          | 0.12                | 3 |
| <b>Thickness-ST</b>                           | -0.66         | 0.01                | 16 | 0.08          | 0.90                | 5 |
| <b>TRAIL</b>                                  | -0.68         | 0.01                | 12 | 0.13          | 0.83                | 5 |

| Variable (mRNA in black; Cell counts in blue) | R (Extrinsic) | p-value (Extrinsic) | n  | R (Intrinsic) | p-value (Intrinsic) | n |
|-----------------------------------------------|---------------|---------------------|----|---------------|---------------------|---|
| <b>Epidermal Thickness</b>                    | -0.73         | 0.00                | 16 | -0.07         | 0.92                | 5 |
| <b>CD83</b>                                   | -0.76         | 0.01                | 10 | -0.25         | 0.68                | 5 |
| <b>OX40L</b>                                  | -0.77         | 0.00                | 12 | 0.12          | 0.85                | 5 |
| <b>CD11c</b>                                  | -0.94         | 0.00                | 16 | -0.02         | 0.97                | 5 |
